# Supplementary material
Source: PubMed Central journal article supplement (PMC2606007)
Supplement: supp_283_52_36061__1.pdf [file supp_283_52_36061__1.pdf]

## *Daniel W. Nebert*

---

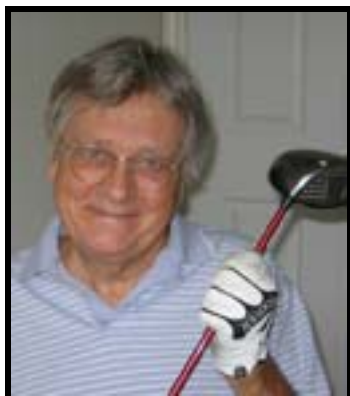

**Current Position:** Professor, Department of Environmental Health; Associate Director, Center for Environmental Genetics (CEG); Professor, Department of Pediatrics & Molecular Developmental Biology in the Division of Human Genetics at University of Cincinnati Medical Center

**Education:** M.D. (1964) and M.S. in Biochemistry from University of Oregon Medical School in Portland; B.A. from Wesleyan University in Middletown, Connecticut

**Non-scientific Interests:** Golf, gardening, piano, snow skiing, squash tennis

After a Pediatrics internship and residency at UCLA, I did a postdoctoral fellowship in the National Cancer Institute (Bethesda, Maryland) and then remained for two decades in the National Institute of Child Health & Human Development before moving to my current position in Cincinnati. Presently, I am the author and coauthor of almost 600 peer-reviewed articles and invited reviews. I began my postdoctoral research on the cytochrome P450 1 (CYP1) family and looked at regulation by the aryl hydrocarbon receptor (AHR) in the late 1960s, and this work has continued ever since. Using genetic differences in mice as well as in human populations, my lab has pioneered such fields as pharmacogenetics, molecular biology and toxicology, evolutionary genomics, gene nomenclature, developmental biology, clinical genetics, teratology, and cancer. Since the late 1970s my lab has pursued the involvement of AHR in the process of inflammation, which has recently been confirmed using various knockout mouse models. The current minireview summarizes the latest data on this topic.

---

**Read Dr. Nebert's article entitled:** Endogenous Functions of the Aryl Hydrocarbon Receptor (AHR): Intersection of Cytochrome P450 (CYP1)-metabolized Eicosanoids and AHR Biology

<http://www.jbc.org/cgi/content/full/283/52/36061>
